# Supplementary material for: Expanded genetic screening in Caenorhabditis elegans identifies new regulators and an inhibitory role for NAD+ in axon regeneration
Source: eLife journal article supplement (doi:10.7554/elife.39756), 2018-11-21
Supplement: supp [file elife-39756-supp-v1.zip]

Archive with 11 entries (11 files):
- elife_poa_e39756_Figure_4_source_data_1.xlsx
- elife_poa_e39756_Figure_3_source_data_1.xlsx
- elife_poa_e39756_Figure_1_supplement_figure_2_source_data_1.xlsx
- elife_poa_e39756_Figure_2_source_data_1.xlsx
- elife_poa_e39756_Transparent_Reporting_File.docx
- elife_poa_e39756_Figure_1_source_data_1.xlsx
- elife_poa_e39756_Figure_2_figure_supplement_1.pdf
- elife_poa_e39756_Figure_5_source_data_1.xlsx
- elife_poa_e39756_Figure_3_figure_supplement_1.pdf
- elife_poa_e39756_Figure_1_figure_supplement_1.pdf
- elife_poa_e39756_Figure_1_figure_supplement_2.pdf
