# Supplementary material for: Expanded genetic screening in Caenorhabditis elegans identifies new regulators and an inhibitory role for NAD+ in axon regeneration
Source: eLife journal article supplement (doi:10.7554/elife.39756), 2018-11-21
Supplement: supp [file elife-39756-supp-v1.zip › elife_poa_e39756_Figure_1_source_data_1.xlsx]

## Sheet: All gene list
Functional category	Public gene name	Reference allele		Category #	Gene class
1	adm-2	tm347		1	Adhesion and ECM
1	adt-1	cn30		2	Channels and transporters
1	adt-2	wk156		3	Cytoskeleton and motors
1	adt-3	ok923		4	Kinases and phosphatases
1	C05D9.7	ok2931		5	Neurotransmission, metabolism, and lipids
1	C18F10.7	tm5628		6	Trafficking
1	C27B7.7	ok2978		7	Signaling and interactions
1	C36B7.5	ok2223		8	Protein turnover
1	C54G4.4	ok2110		9	Gene expression and RNA
1	cdh-10	ok2920
1	cdh-4	hd40
1	chhy-1	ok3088
1	clec-43	ok3188
1	clec-50	ok2456
1	clec-78	ok2088
1	col-179	ok3010
1	col-184	ok3742
1	dpy-10	e128
1	dpy-31	tm2880
1	egas-3	ok1522
1	emb-9	tk75
1	epi-1	gm121
1	F35G2.1	ok1669
1	fbl-1	k201
1	gem-4	dx77
1	gly-2	tm839
1	grl-22	ok2704
1	hst-1	ok1068
1	igcm-2	ok1527
1	K11H12.8	tm5593
1	lad-2	hd31
1	lon-3	ok2076
1	lrx-1	ok3104
1	lurp-1	tm1409
1	magu-2	gk218
1	max-1	ju39
1	mec-5	e1340
1	mig-17	k174
1	mig-21	u787
1	mig-22	tk69
1	mlt-10	ok2581
1	oga-1	ok1207
1	osm-11	n1604
1	ram-2	bx32
1	rib-1	tm516
1	rib-2	tm710
1	rig-1	ok1540
1	smp-1	ev715
1	smp-2	ev709
1	sqt-3	b238
1	sqv-5	k172
1	sup-17	n1258ts
1	syg-1	ky652
1	syg-2	ky673
1	ZC116.3	ok1618
1	zig-1	ok784
1	zig-10	tm6127
1	zig-11	ok2383
1	zig-2	ok696
1	zig-3	ok1476
1	zig-4	gk34
1	zig-5	ok1605
1	zig-6	ok723
1	zig-8	ok561
2	abts-1	ok1566
2	acc-1	tm3268
2	acc-3	tm3174
2	anoh-1	tm4762
2	anoh-2	tm4796
2	aqp-11	ok3578
2	aqp-2	ok2159
2	aqp-8	ok2800
2	aqp-9	ok2487
2	asic-1	ok415
2	asic-2	ok289
2	avr-14	ad1302
2	avr-15	ad1051
2	B0041.5	tm3921
2	catp-1	kr17
2	ccb-2	ok862
2	ced-11	tm2220
2	clh-2	tm6080
2	clh-3	ok763
2	cng-1	jh111
2	cua-1	gk107
2	egl-19	ad1006
2	fgt-1	tm3165
2	glc-2	ok1047
2	gtl-1	ok375
2	haf-1	ok705
2	inx-11	ok2783
2	inx-22	tm1661
2	kcc-2	vs132
2	kcnl-2	ok2818
2	lgc-12	ok3546
2	lgc-4	ok2567
2	lgc-46	ok2949
2	lgc-55	n4331
2	lhfp-4	tm1751
2	mec-10	tm1552
2	mfsd-6	ju833
2	mrp-3	ok955
2	nca-2	gk5
2	ncs-4	tm4409
2	ncs-5	tm4591
2	ncs-7	tm4648
2	nhx-1	tm743
2	nmr-1	ak4
2	nmr-2	tm3785
2	osm-9	ky10
2	sid-1	qt2
2	snf-1	ok790
2	snf-10	hc194
2	snf-12	fr75
2	snf-2	ok147
2	snf-4	ok496
2	snf-6	eg28
2	snf-7	ok482
2	snf-8	ok349
2	snf-9	ok957
2	spin-4	ju1315
2	T23G5.3	ok2019
2	tmc-1	ok1859
2	tmc-2	ok1302
2	trp-2	gk298
2	tsp-15	sv15
2	unc-68	e540
2	zipt-7.1	ok971
3	alp-1	ok820
3	atat-2	ok2415
3	atn-1	ok84
3	clip-1	gk470
3	cls-3	ok3375
3	coel-1	gk1266
3	crb-1	ok931
3	dnc-4	or633ts
3	dylt-2	gk762
3	elpc-1	tm2149
3	F27C1.11	tm4138
3	fli-1	ky535
3	gsnl-1	ok2979
3	ivns-1	ok3171
3	jac-1	ok3000
3	K09C6.7	gk3297
3	kel-8	tm5214
3	klc-2	km11
3	klp-12	tm5176
3	klp-13	tm3737
3	klp-17	ok1630
3	klp-4	tm2114
3	let-805	ju1122gf
3	mcrs-1	tm3861
3	mec-7	ok2152
3	mec-12	e1605
3	mec-17	ok2109
3	mei-1	or642
3	memo-1	gk345
3	mks-6	gk674
3	noca-1	ok3692
3	nud-1	ok552
3	nud-2	ok949
3	pfn-1	ok808
3	pfn-3	tm1362
3	R12E2.1	tm3676
3	R90.1	tm4852
3	ret-1	gk242
3	rsa-1	or598
3	rsa-2	tm3051
3	sas-6	ok2554
3	spd-2	or493ts
3	spd-5	or213ts
3	T04F8.6	tm4830
3	T15B12.1	gk750
3	tba-7	gk787939
3	tba-9	ok1858
3	tbb-2	gk129
3	tor-2	tm697
3	tppp-1	tm4902
3	ttll-11	tm4059
3	ttll-12	tm4957
3	ttll-15	tm3871
3	twf-2	ok3564
3	unc-59	e1005
3	unc-60	m35
3	unc-61	n3169
3	unc-84	n369
3	vab-10	e698
3	yop-1	tm3667
3	zyg-12	or577
4	aak-1	tm1944
4	air-2	or207
4	ark-1	sy247
4	B0198.3	ok1974
4	C03B1.5	ok2345
4	C04F12.8	tm5298
4	C24F3.2	tm5115
4	C27B7.6	ok2515
4	cki-2	ok2105
4	cmk-1	oy21
4	cnep-1	tm4369
4	cst-1	tm1900
4	D2023.6	ok3130
4	dep-1	ok1844
4	dkf-1	pr2
4	F11E6.8	ok2754
4	F13D11.3	tm5591
4	F26A3.4	tm5286
4	F28C10.3	tm3995
4	grk-2	gk268
4	hpk-1	pk1393
4	kin-23	ok766
4	lit-1	or393
4	mtk-1	ok1382
4	old-1	ok1273
4	old-2	ok1253
4	pef-1	ok1979
4	pgam-5	ju1537
4	phlp-2	tm6177
4	pkg-2	ok966
4	plk-1	or683ts
4	plk-2	ok1936
4	plk-3	ok2812
4	pmk-2	qd284
4	ppm-1	ok578
4	pptr-2	ok1467?
4	R151.1	ok2347
4	rol-3	e754
4	sax-1	ju1296
4	sma-5	n678
4	sur-6	ku123
4	svh-2	tm737
4	T12B3.1	ok2899
4	T13H5.1	ok3379
4	tag-344	ok1500
4	tap-1	gk202
4	vhp-1	sa366
4	Y53F4B.1	gk1289
4	ZC477.2	ok3206
4	ZK757.2	ok3597
4	zyg-1	or297
5	abhd-5.1	ok3722
5	abhd-5.2	ok3245
5	acr-23	ok2804
5	aex-2	sa3
5	age-1	hx546
5	asm-3	ok1744
5	ath-1	ok1735
5	basl-1	ok703
5	bli-3	n529
5	cab-1	tg46
5	cat-2	e1112
5	cat-4	tm773
5	cept-1	et10
5	cept-2	ok3135
5	cka-1	tm1241
5	cka-2	tm841
5	ckr-1	ok2502
5	ckr-2	tm3082
5	cpd-1	tm3451
5	cpd-2	ok3147
5	cpna-1	ok969
5	cpna-2	gk428
5	cpna-5	ok1091
5	cpr-1	ok1344
5	cpr-4	ok3413
5	cpr-5	ok2344
5	cpx-1	ok1552
5	cpz-1	ok497
5	cpz-2	ok1012
5	D1054.1	tm3111
5	daf-28	tm2308
5	dagl-2	tm2908
5	dat-1	ok157
5	dcar-1	tm2484
5	dhhc-1	gk1067
5	dhhc-11	gk1105
5	dhhc-13	gk36
5	dhhc-14	gk330
5	dhhc-2	ok990
5	dhhc-9	gk985
5	dop-2	vs105
5	dop-4	tm1392
5	drp-1	tm1108
5	duox-2	ok1775
5	eat-18	ad1110
5	eat-3	tm1107
5	ethe-1	ok3755
5	exp-1	ok1131
5	F47E1.1	tm462
5	F59D12.1	gk1000
5	fasn-1	fr8
5	ferl-1	ok2339
5	fis-2	tm1832
5	flp-11	tm2706
5	gnrr-6	ok3362
5	gur-3	ok2246
5	har-1	gk3124
5	hdl-1	ok956
5	hipr-1	ok1081
5	hosl-1	gk278589
5	hrg-1	tm3199
5	ins-11	tm1053
5	K10C2.1	gk282876
5	lid-1	gk575511
5	lipl-1	tm1954
5	lipl-2	tm4324
5	lipl-3	tm4498
5	lipl-4	tm4417
5	lite-1	ce314
5	mcu-1	ju1154
5	mev-1	kn1
5	mgl-1	tm1811
5	mgl-2	tm355
5	mgl-3	tm1766
5	mrp-2	ok2157
5	mspn-1	tm3831
5	natc-2	ju1406
5	neto-1	ok2468
5	nlp-14	tm1880
5	nlp-29	tm1931
5	nlp-3	tm3023
5	nlp-7	tm2984
5	nlp-9	tm3572
5	nmat-1	ju1565
5	nmat-2	tm2905
5	nmrk-1	ok2571
5	npr-20	tm4386
5	npr-22	ok1598
5	npr-24	ok3192
5	npr-25	ok2008
5	npr-3	tm1583
5	npr-32	ok2541
5	npr-4	tm1782
5	nprt-1	tm6342
5	obr-1	xh16
5	obr-2	xh17
5	obr-3	tm1087
5	obr-4	tm1567
5	ocrl-1	gk752
5	odc-1	pc13
5	ogt-1	tm1046
5	pah-1	ok687
5	paqr-2	tm3410
5	parg-1	gk120
5	parg-2	ok980
5	parp-1	ok988
5	parp-2	ok344
5	pcyt-1	et9
5	pcyt-2.1	gk440213
5	pcyt-2.2	ok2179
5	piki-1	ok2346
5	plc-2	ok1761
5	plc-4	ok1215
5	pld-1	ok2222
5	pll-1	ok2003
5	plpp-1.1	ok1861
5	pnc-1	tm3502
5	pnc-2	tm6438
5	ppt-1	gk134
5	pqbp-1.1	ok2670
5	pqn-13	tm3887
5	pqn-41	tm4700
5	ptps-1	tm1984
5	qns-1	ju1563
5	sams-1	ok3033
5	scrm-2	ok1313
5	scrm-3	tm639
5	sdha-2	tm1420
5	sesn-1	ok3157
5	snn-1	tm2557
5	sra-2	gk765210
5	stam-1	ok406
5	stn-2	ok2417
5	supr-1	ju1118
5	syx-16	tm1560
5	T10B10.3	ok2184
5	tank-1	ok446
5	tbh-1	n3247
5	tkr-1	ok2886
5	trpp-8	tm5871
5	tyr-1	ok1425
5	tyr-2	ok1363
5	tyr-3	ok1194
5	ucr-2.3	ok3073
5	vps-60	tm1394
5	ymel-1	tm1920
6	aex-3	sa5
6	alfa-1	ok3062
6	alx-1	gk338
6	amph-1	ok3443
6	clu-1	ok2
6	eat-17	ok2928
6	eea-1	tm933
6	esyt-2	ok2509
6	exc-5	rh232
6	F35A5.8	ok463
6	gos-28	tm2800
6	jph-1	ok2823
6	ncr-1	nr2022
6	ncr-2	nr2023
6	nex-1	gk148
6	nex-2	ok764
6	nex-3	gk385
6	nex-4	gk102
6	rab-11.2	tm2081
6	rab-3	js49
6	rab-39	tm2466
6	rab-8	tm2526
6	ric-4	gk312
6	rsef-1	ok1356
6	sar-1	ok3153
6	sec-16	tm6250
6	snb-6	tm5195
6	sng-1	ok234
6	snt-3	tm2426
6	snt-5	tm3768
6	snt-7	tm5107
6	spg-20	tm5514
6	tag-232	gk325
6	tat-1	tm1034
6	tbc-2	tm2241
6	tram-1	tm6184
6	vpr-1	tm1411
6	Y54E5A.7	tm3703
7	bath-44	tm2792
7	C09F5.1	ok2863
7	C39F7.5	gk693287
7	cas-2	ok1676
7	ced-10	n3246
7	cgef-1	gk261
7	crm-1	tm2218
7	ctl-1	ok1242
7	ctl-2	ua90
7	daf-1	m40
7	drag-1	tm3773
7	ect-2	ku247
7	F46H5.4	ok2501
7	fkb-2	ok3007
7	frm-7	ok2081
7	ftt-2	n4426
7	gbb-1	tm1406
7	gbb-2	tm1165
7	gipc-1	hc192
7	gipc-2	ok1172
7	gpa-12	pk322
7	gpa-7	pk610
7	gtbp-1	ax2068
7	ift-139	gk508
7	ist-1	ok2706
7	K10B4.3	tm2268
7	lin-2	e1309
7	magi-1	zh66
7	magu-4	ok484
7	mctp-1	tm6603
7	mif-2	tm818
7	mif-3	gk228
7	miro-1	tm1966
7	miro-3	tm3150
7	mpz-4	ok1143
7	ncs-2	tm1943
7	osm-7	tm2256
7	par-2	or640ts
7	pinn-1	tm2235
7	prmt-5	gk357
7	qui-1	gb404
7	rap-1	tm861
7	rga-1	ok204
7	rgl-1	ok1921
7	rgs-9	ok461
7	shc-1	ok198
7	shc-2	tm328
7	smz-1	ok3576
7	soc-2	ku167
7	srgp-1	gk3182
7	swan-1	ok267
7	swan-2	ok964
7	tag-30	tm8204
7	tag-325	ok1330
7	tag-52	gk162
7	tag-77	tm702
7	tiam-1	ok772
7	tig-3	tm2092
7	tkr-2	ok1620
7	trxr-1	sv47
7	trxr-2	tm2047
7	ung-1	ok3593
7	wdfy-3	ok912
7	wdr-23	tm1817
7	Y71F9AR.2	ok1893
8	brap-2	ok1492
8	C04E6.5	ok1497
8	cdc-48.1	tm544
8	cdc-48.2	tm659
8	ced-13	sv32
8	ced-9	n1950
8	crn-3	ok2269
8	csp-2	ok1742
8	csp-3	ok1653
8	dnj-17	tm570
8	dnj-23	tm7102
8	eel-1	ok1575
8	F07B7.12	ju1285
8	F29G6.1	tm3752
8	fbxc-50	tm5154
8	fbxl-1	ok3741
8	hecd-1	ok1437
8	hrdl-1	gk28
8	hsp-25	tm700
8	lgg-1	tm3489
8	lgg-2	tm5755
8	math-33	ok2974
8	mel-26	or543ts
8	natb-1	ju1405
8	plr-1	zd165
8	rad-23	tm2595
8	rnf-5	tm794
8	skr-1	ok1696
8	skr-3	ok365
8	skr-5	ok3068
8	skr-9	ok3453
8	sqst-1	ok2892
8	T01C3.3	ok2482
8	T14G8.3	ok502
8	T20F5.6	tm4049
8	tep-1	tm3720
8	ubc-19	gk468454
8	ubr-1	hp821, hp833
8	ufd-3	tm2915
8	ulp-5	tm3063
8	usp-14	tm1481
8	usp-33	tm4881
8	usp-48	mg451
8	Y38H8A.2	ok1535
8	Y45F10B.8	ok1607
8	Y51F10.2	ok1610
9	aco-1	ok924
9	ahr-1	ju145
9	ain-1	tm3681
9	ain-2	tm2432
9	alg-4	gk188
9	atf-7	gk715
9	atfs-1	gk3094
9	atx-2	tm3562
9	bcl-11	tm522
9	blmp-1	s71
9	cebp-2	tm5421
9	crh-1	n3315
9	crh-2	tm297
9	csr-1	fj54
9	dcr-1	ok247
9	E02D9.1	tm4000
9	ekl-5	tm2531
9	elpc-3	ok2452
9	elt-1	ju1392
9	ergo-1	tm1860
9	ess-2	tm2426
9	ets-4	ok165
9	fust-1	tm4439
9	glh-1	ok439
9	glh-2	um2
9	glh-4	gk225
9	his-72	tm2066
9	hlh-30	tm1978
9	hrde-1	tm1200
9	hsf-1	sy441ts
9	jmjd-3.3	tm3197
9	lim-9	gk106
9	mec-8	e398
9	mir-232	nDf56
9	mls-2	tm252
9	mml-1	ok849
9	mut-16	tm3748
9	mut-2	ne3370
9	mut-7	ne4255
9	mxl-2	tm1516
9	mxl-3	ok1947
9	nhr-45	tm1307
9	nhr-49	nr2041
9	nhr-80	tm1011
9	nhr-84	ok792
9	nhr-91	tm4713
9	nrd-1	tm2657
9	nrde-3	tm1116
9	pash-1	mj100ts
9	pcaf-1	tm3318
9	phf-30	gk241490
9	prg-2	tm1094
9	rde-2	ne221
9	rict-1	mg360
9	rncs-1	tm1632
9	rsp-4	tm837
9	rsp-6	tm367
9	rsr-1	tm1393
9	rtcb-1	gk451
9	set-25	n5021
9	set-32	ok1457
9	skn-1	ok2315
9	smg-3	r930
9	spn-4	or191
9	ssup-72	tm2304
9	sta-2	ok1860
9	stau-1	tm2266
9	suf-1	ok2013
9	syd-9	ju49
9	tdp-1	ok803
9	unc-30	e191
9	wago-1	tm1414
9	wago-10	tm1186
9	wdr-5.1	ok1417
9	wdr-5.2	ok1444
9	xpa-1	gk674
9	Y51H4A.13	ok3209
9	ZK177.3	tm957
