# Supplementary material for: Expanded genetic screening in Caenorhabditis elegans identifies new regulators and an inhibitory role for NAD+ in axon regeneration
Source: eLife journal article supplement (doi:10.7554/elife.39756), 2018-11-21
Supplement: supp [file elife-39756-supp-v1.zip › elife_poa_e39756_Figure_1_supplement_figure_2_source_data_1.xlsx]

## Sheet: A
emb-9	epi-1	adt-1	adt-2	adt-3	gon-1	mig-17
0.766942	0.737439	0.132231	0.477707	0.106231	0.649468	0.617034
0.784573	0.768384	0.21157	0.607991	0.110151	0.894349	1.01422
0.824645	0.945087	0.21157	0.703532	0.173258	0.947584	1.02561
0.976303	0.988439	0.431956	0.764331	0.248588	1.09664	1.04265
0.978512	1.0577	0.454976	0.9641	0.261491	1.12858	1.0673
1.1564	1.07455	0.458402	1.04227	0.266199	1.20311	1.10899
1.21653	1.08298	0.564187	1.05096	0.301318	1.29893	1.13401
1.22275	1.08854	0.587678	1.05964	0.392237	1.32023	1.14692
1.22275	1.10455	0.606635	1.09438	0.45951	1.41605	1.15902
1.24297	1.16185	0.606635	1.16387	0.474576	1.6077	1.17535
1.25118	1.18412	0.625895	1.30284	0.489642		1.18483
1.29587	1.19254	0.796209	1.78054	0.490296		1.21327
1.32231	1.25154	0.802204		0.497175		1.23223
1.40165	1.26463	0.900474		0.504708		1.27576
1.4218	1.2659	0.934435		0.539326		1.27962
1.44076	1.27457	0.978512		0.549906		1.30911
1.45454	1.30465	1.00474		0.555669		1.34247
1.50711	1.32739	1.04265		0.572012		1.36748
1.50744	1.32739	1.09005		0.580038		1.37441
1.52507	1.34393	1.10901		0.625235		1.40083
1.58678	1.35267	1.13744		0.632768		1.46919
1.59559	1.37861	1.18483		0.633369		1.49763
1.62085	1.41329			0.660907		1.50089
1.67493	1.43272			0.6619		1.75355
1.70138	1.46473			0.670086		1.93365
1.78953	1.46532			0.670086
1.86006	1.50867			0.670433
2.02844	1.52076			0.708098
	1.54652			0.780238
	1.6088			0.783428
	1.65607			0.789417
	1.72086			0.800817
	1.75144			0.821092
	1.76012			0.828625
	1.83292			0.908747
	1.84092			0.945464
				1.07865
				1.07865
				1.08315
				1.09499
				1.12905
				1.17495
				1.30346
				1.32181
				1.37689
				1.69816

## Sheet: B
rab-8	rab-11.2	nex-1	nex-2	nex-3	nex-4
0.12357	0.637975	0.748402	0.217795	0.333734	0.829826
0.166628	0.675958	0.82975	0.721588	0.739627	0.847865
0.346682	0.824051	0.929044	0.856885	0.775706	0.856885
0.347209	0.824051	0.938064	0.974143	0.883945	0.938064
0.483982	0.832911	1.1226	0.983266	1.0463	0.992183
0.509725	0.850633	1.17955	1.00149	1.05532	1.14552
0.535469	0.902439	1.17955	1.01972	1.06434	1.15454
0.642706	0.921519	1.1816	1.08238	1.07336	1.16356
0.698513	0.963415	1.21768	1.12748	1.0914	1.16356
0.700164	0.972125	1.33411	1.15641	1.11846	1.20866
0.741205	1.06329	1.33494	1.21108	1.26278	1.24474
0.767162	1.08987	1.35038	1.23842	1.2718	1.25376
0.792906	1.08987	1.35851	1.23842	1.34396	1.48827
0.823288	1.14634	1.36665	1.24754	1.37102	1.49729
0.835812	1.16376	1.36665	1.25376	1.52435
0.847913	1.20732	1.42514	1.26278	1.61455
0.865847	1.23345	1.43986	1.27487
0.90537	1.26829	1.45613	1.28399
0.913579	1.31139	1.46121	1.30788
0.929995	1.32911	1.47925	1.39334
0.930206	1.3557	1.57847	1.39808
0.930206	1.36411	1.62696	1.39808
0.973112	1.39024	1.64161	1.48827
1.0246	1.45317	1.66763	1.50631
1.02849	1.49747	1.69573	1.51533
1.09416	1.56446	2.21888	1.51533
1.32399	1.65696	2.2279	1.53337
1.35069	1.86063		1.54826
			1.58471
			1.64161

## Sheet: C
WT	mec-17	atat-2	mec-17;atat-2
0.147933	0.0377655	0.092846	0
0.24799	0.0418345	0.313914	0
0.47522	0.043305	0.397194	0
0.542699	0.152422	0.415421	0.00617168
0.566483	0.231939	0.469983	0.100682
0.604249	0.236048	0.490952	0.113297
0.610081	0.270321	0.561848	0.125584
0.780488	0.282308	0.566483	0.151062
0.782362	0.50354	0.691841	0.194789
0.793076	0.516129	0.705699	0.215583
0.853656	0.518945	0.747267	0.226593
0.868607	0.528717	0.857237	0.231625
0.893784	0.573108	0.918961	0.276947
0.923602	0.599984	1.08584	0.425846
0.93155	0.645035	1.12879	0.445696
0.944548	0.722274	1.17073	0.460506
1.07002	0.723281	1.18332	0.491576
1.07002	0.725828	1.24626	0.534131
1.08261	0.742722	1.28652	0.536203
1.08261	0.751169	1.29662	0.541306
1.08261	0.768636	1.3092	0.541306
1.09822	0.771554	1.37215	0.58371
1.17399	0.868607	1.48544	0.606134
1.18332	0.93155	1.49803	0.623247
1.23391	0.956727	1.50636	0.657763
1.23646	0.961193	1.60584	0.67978
1.24626	1.29662	1.61133	0.67978
1.27913	1.29662	1.67786	0.690639
1.29662	1.3092	2.01416	0.717545
1.29877	1.40991		0.77464
1.38412	1.49803		0.793076
1.44768	1.67427		0.818253
1.4631			0.84343
1.49018			0.860389
1.81382			0.893784
			0.981904
			1.00667
			1.00708
			1.03226
			1.23321
			1.4327
			1.59874

## Sheet: D
mec-12(tm5083)	mec-12(e1605)	tba-1(ok1135)	tba-7(gk787939)	tba-7(u1015)	tba-9(ok1858)	mec-7(ok2152)	tbb-2(gk129)	tbb-4(ok1461)	tbb-6(tm2004)
0.060352	0.167005	0.411233	0.753311	0.637007	0.105882	0.761065	0.209731	0.642898	0.579513
0.140821	0.377958	0.583321	1.00166	1.0541	0.146624	0.898604	0.234899	0.651952	0.588568
0.140821	0.386748	0.610966	1.12583	1.16026	0.276923	0.913756	0.302013	0.679117	0.615733
0.261526	0.571332	0.620181	1.14238	1.21335	0.342081	0.986955	0.419463	0.679117	0.697227
0.432523	0.606491	0.657042	1.18378	1.27401	0.411028	1.03148	0.56208	0.697227	0.823995
0.472758	0.62407	0.666257	1.20033	1.3271	0.427052	1.13801	0.578859	0.805886	0.860215
0.583403	0.650439	0.668253	1.42384	1.33468	0.464253	1.18137	0.629195	0.814941	0.878325
0.643755	0.747127	0.668253	1.66391	1.38018	0.488688	1.30936	0.755034	0.842105	0.932654
0.784577	0.826234	0.71585	1.66391	1.83519	0.49115	1.52126	0.813758	0.959819	0.968874
0.824811	0.94929	0.721548	1.71358	1.91102	0.561991	1.61311	1.0906	1.03226	0.996038
0.83487	0.975659	0.804485	1.73841		0.700453		1.14094	1.03226	1.14997
0.905281	0.984449	0.8137	1.75497		0.749321		1.36745	1.04131	1.30391
0.915339	1.01082	0.8137	1.78808		0.763566		1.37584	1.17714	1.39445
0.955574	1.01082	0.8396	1.79636		0.779591		1.66946		1.40351
0.98575	1.08993	0.868158	1.79636		0.81448				1.6661
1.00587		0.868158			0.819652
1.05616		0.887421			0.827664
1.61945		0.887421			0.915799
		0.906235			0.947848
		0.933497			1.00181
		0.944312			1.01195
		0.961143			1.06803
		0.970358			1.12412
		0.991909			1.44977
		1.01095
		1.02565
		1.17277
		1.24681
		1.37268
		1.44955
		1.50595

## Sheet: E
fli-1	gsnl-1	viln-1	twf-2
0.0638182	0.645638	0.384177	0.381535
0.110144	0.689262	0.799462	0.583982
0.388885	0.741611	0.847635	0.59848
0.392026	0.79396	0.876705	0.628171
0.42973	0.811409	0.879197	0.693477
0.436782	0.820134	0.950626	0.715661
0.462162	0.872483	0.978865	0.724138
0.486486	0.881208	0.982187	0.731924
0.49253	1.03825	1.00627	0.769474
0.510811	1.0906	1.04116	0.802002
0.510811	1.15168	1.08767	0.816973
0.539641	1.18658	1.1782	0.838145
0.558485	1.20403	1.59183	1.02002
0.593819	1.21275		1.05062
0.612663	1.56174		1.06396
0.623656			1.09246
0.64054			1.14946
0.672973			1.16186
0.745946			1.18354
0.794595			1.21468
0.797967			1.24583
0.810811			1.27697
0.851351			1.30051
0.883784			1.32046
0.962856			1.32996
0.997297			1.35229
1.01351			1.37183
			1.37745
			1.4251
			1.45057
			1.46385
			1.47245
			1.48556
			1.54845
			1.58114
			1.62445
			1.63395
			1.65295
			1.68144
			1.74757
			1.74757
			1.8516
			1.86177
			1.8828
			1.93481
			1.94051
			2.19487
			3.16228

## Sheet: F
WT	mfsd-6(ju833)	mfsd-6(tm3356)	mfsd-6(tm3356); Ex[Pn::mfsd-6]
1.48775	0.516704	0.604651	0.712411
1.48775	1.16704	0.658915	0.820763
1.18485	0.944321	0.635659	0.893162
0.507795	0.962138	0.643411	0.931728
1.48775	0.908686	0.674419	0.986245
0.516704	0.632517	0.465116	1.00198
1.46103	0.641425	0.705426	1.02769
0.552338	0.178174	0.790698	1.05432
1.00668	0.783964	0.713178	1.14016
0.694878	0.632517	0.565891	1.3073
1.10468	0.481069	0.356589	1.51241
0.908686	0.694878	0.565891
0.409799	0.730512	0.72093
0.605791	0.498886	1.27132
0.953229	0.445434	0.511628
1.63029		0.875969
0.844961		0.790698
0.682171		0.286822
1.51938
0.930233
0.782946
0.589147
1.46512
0.348837
1.34109
0.883721
1.1783
