# Supplementary material for: Expanded genetic screening in Caenorhabditis elegans identifies new regulators and an inhibitory role for NAD+ in axon regeneration
Source: eLife journal article supplement (doi:10.7554/elife.39756), 2018-11-21
Supplement: supp [file elife-39756-supp-v1.zip › elife_poa_e39756_Figure_2_source_data_1.xlsx]

## Sheet: C
nmat-2(ju1512)	nmat-2(ju1514)	nmat-2(tm2905)	juSi347	nmat-2(tm2905); juSi347	qns-1	nmat-1	nmrk-1	nprt-1	pnc-1	pnc-2	pnc-1; pnc-2
0.605559	0.740418	0.808471	0.75784	0.43554	0.423077	0.561045	0.473958	0.326511	0.182802	0.502869	0.603448
0.754467	1.05401	0.816726	0.790153	0.75784	0.509615	0.575809	0.567057	0.469202	0.232017	0.574605	0.62069
0.861029	1.05902	0.976868	0.810105	0.810105	0.655743	0.583191	0.568505	0.561531	0.375194	0.610474	0.732759
0.862369	1.14112	1.05694	0.853659	0.853659	0.673077	0.590573	0.624555	0.603499	0.379665	0.673166	0.801724
0.87108	1.14112	1.12386	0.905923	0.905923	0.799773	0.620102	0.727865	0.62069	0.435911	0.77389	0.809671
0.889414	1.20209	1.20907	0.94996	0.993031	0.856762	0.649631	0.728648	0.646552	0.450736	0.789813	0.836207
0.923345	1.27178	1.21708	0.958838	1.01045	0.903846	0.708688	0.770182	0.706897	0.576528	0.824251	0.884226
0.932056	1.28595	1.2411	1.01045	1.02788	0.923077	0.819421	0.787109	0.75	0.667929	0.825681	0.884226
0.955647	1.31533	1.2439	1.0453	1.02788	0.944129	0.819421	0.792705	0.779765	0.710938	0.857825	0.896552
0.958188	1.32404	1.26965	1.07425	1.0453	0.952369	0.841567	0.856762	0.844828	0.752298	0.868723	0.906593
1.00174	1.32918	1.27906	1.08885	1.0453	1.02491	0.856332	0.936833	0.846914	0.752298	0.883006	0.928959
1.01916	1.38502	1.28746	1.08885	1.05401	1.04893	0.856332	0.947917	0.87069	0.759329	0.908187	0.94387
1.02188	1.5453	1.30516	1.10627	1.06272	1.09698	0.863714	0.973307	0.872094	0.803267	1.0257	0.948276
1.0408	1.5453	1.47671	1.11498	1.07143	1.10577	0.908007	0.992883	0.887931	0.836669	1.02654	0.951326
1.12177	1.55611	1.47671	1.1364	1.08014	1.10607	0.930153	1.00089	0.896552	0.836841	1.04249	0.974138
1.13542	1.56692	1.50523	1.14528	1.08885	1.10892	0.930153	1.06495	0.905172	0.862022	1.10124	0.974138
1.25843	1.61014	1.52135	1.14983	1.08885	1.1254	0.967064	1.07487	0.939655	0.906977	1.10963	1.0557
1.32032	1.68118	1.52265	1.15416	1.10627	1.13701	1.01874	1.0918	0.939655	0.914007	1.22714	1.09298
1.33024	1.73982	1.53318	1.20742	1.11498	1.15712	1.05565	1.09698	0.948276	0.9351	1.2274	1.11207
1.33412	2.00348	1.54878	1.24294	1.1324	1.16103	1.07041	1.11719	0.974138	0.979533	1.24175	1.34647
1.34146	2.25852	1.56141	1.24564	1.14983	1.16346	1.0778	1.129	1.03157	0.991347	1.5461	1.37931
1.35305	2.29094	1.57491	1.2892	1.14983	1.16563	1.08518	1.14258	1.03448	1.00541	1.82309	1.39655
1.36003	2.30175	1.58024	1.3406	1.16725	1.1666	1.09256	1.26107	1.06515	1.01244	2.02454	1.40611
1.36251		1.60943	1.34947	1.18467	1.16904	1.09994	1.29492	1.1323	1.20616		1.58621
1.36251		1.62095	1.41115	1.2108	1.17308	1.18115	1.39324	1.27586	1.25652		2.10345
1.37197		1.64612	1.44714	1.24564	1.18269	1.20329	1.41341	1.35345	1.4132
1.44805		1.66417	1.4547	1.2892	1.19231	1.2402		1.61207	1.44118
1.44937		1.67435	1.5331	1.41115	1.19306	1.26235		1.63591	1.44957
1.44937		1.69659	1.53592	1.41115	1.21668	1.26973			1.60303
1.45713		1.8101		1.4547	1.25723	1.38047			1.76014
1.46659		1.81882		1.4547	1.25922	1.40261
1.47212		1.84495		1.5331	1.29715	1.58717
1.48551		1.88141		1.67247	1.31731	1.97104
1.50893		1.92352			1.36435
1.52439		1.93206			1.36922
1.53282		1.96675			1.42087
1.5331		2.77722			1.48132
1.58013		2.92851			1.54808
1.58013					1.66921
1.59828					1.74039
1.60279
1.60852
1.60852
1.60852
1.61813
1.62892
1.65337
1.66777
1.70313
1.72206
1.73152
1.75044
1.75044
1.77697
1.79385
1.86949
1.88291
1.88291
1.89895
2.04239
2.11804
2.20449
2.32336

## Sheet: D
WT	juEx[Pmec-4]	juEx[Pcol-12]	juEx[Pmtl-2]	ju1512	ju1512;juEx[Pmec-4]	ju1512;juEx[Pcol-12]	ju1512;juEx[Pmtl-2]	ju1512;juEx[Pcol-12+Pmtl-2]	ju1512;juEx[all3]
0.605559	0.482555	0.482555	0.558249	0.605559	0.473093	0.842105	0.882104	0.797286	0.385887
0.643406	0.81372	0.66233	0.605559	0.834165	0.728563	0.889414	0.924512	0.941476	0.436797
0.700177	0.823182	0.690716	0.756949	0.861029	0.81372	0.955647	1.06022	0.941476	0.436797
0.738025	0.861029	0.738025	0.804258	0.889414	0.927262	1.00296	1.0687	1.00085	0.517089
0.75634	0.879953	0.861029	0.823182	0.955647	1.02188	1.00296	1.07718	1.15352	0.531532
0.76641	0.9178	1.12596	0.823182	1.02188	1.05027	1.01242	1.09415	1.17048	0.61742
0.825799	0.965109	1.20166	0.851567	1.0408	1.05973	1.03134	1.11959	1.17048	0.75634
0.872106	1.0408	1.3152	0.861029	1.13542	1.15435	1.07865	1.18745	1.17897	0.85667
0.879953	1.14488	1.44766	0.908338	1.18026	1.19219	1.1165	1.18745	1.18745	0.873874
0.918412	1.20166	1.45713	0.936724	1.18913	1.22058	1.19219	1.22137	1.21289	0.903375
0.927262	1.22058	1.6369	0.946186	1.2335	1.23004	1.2395	1.22137	1.22137	0.910695
0.936724	1.24897		1.05027	1.25843	1.2395	1.25843	1.24682	1.31467	0.933157
0.936724	1.46659		1.07865	1.27787	1.2395	1.28681	1.27226	1.33164	0.933157
0.957001			1.07865	1.33412	1.25843	1.30574	1.35708	1.4419	0.954955
0.957001			1.13542	1.35305	1.25843	1.44766	1.35708	1.56913	0.981982
0.964719			1.14488	1.36251	1.26789	1.56121	1.36556	1.59457	1.00901
0.987872				1.36251	1.26789	1.59905	1.39949	1.63698	1.00901
1.03134				1.37197	1.27735	1.6369	1.47583	1.70484	1.01103
1.0408				1.45713	1.30574	1.7126	1.50127	1.74724	1.03243
1.0419				1.46659	1.30574	1.85452	1.54368	1.76421	1.04961
1.0419				1.48551	1.32466	2.09107	1.66243	1.8151	1.05405
1.05973				1.53282	1.32466		1.73876		1.05405
1.05973				1.58013	1.33412		1.84902		1.06505
1.0882				1.58013	1.37197		2.01018		1.08108
1.10364				1.60852	1.39089				1.09592
1.21169				1.60852	1.40982				1.11907
1.27343				1.60852	1.46659				1.14994
1.44766				1.61509	1.47605				1.15315
1.60852				1.64171	1.47605				1.16538
1.61798				1.67721	1.5139				1.18134
				1.70313	1.54228				1.26075
				1.72206	1.54228				1.27928
				1.73152	1.55174				1.33024
				1.75044	1.60852				1.33024
				1.75044	1.61798				1.36036
				1.88291	1.64636				1.47915
				1.88291	1.64636				1.4955
				2.20965	1.67475				1.51351
					1.7126				1.54955
					1.72206
					1.87345
					1.98699
