# Supplementary material for: Expanded genetic screening in Caenorhabditis elegans identifies new regulators and an inhibitory role for NAD+ in axon regeneration
Source: eLife journal article supplement (doi:10.7554/elife.39756), 2018-11-21
Supplement: supp [file elife-39756-supp-v1.zip › elife_poa_e39756_Figure_3_source_data_1.xlsx]

## Sheet: C
jph-1(ok2823)	esyt-2(ju1409)	anoh-1(tm4762)	anoh-2(tm4796)	anoh-1; -2	obr-1(xh16)	obr-2(xh17)	obr-3(tm1087)	obr-4(tm1567)	obr-1,2,3,4
0.441733	0.263979	0.0968939	0.168376	0.100589	0.525951	0.18731	0.115963	0.538085	0.0280629
0.493938	0.438344	0.352282	0.356997	0.437896	0.598393	0.440796	0.392223	0.603423	0.285428
0.501782	0.488982	0.393522	0.83152	0.445482	0.600438	0.516879	0.445911	0.815374	0.34271
0.648523	0.55649	0.496457	0.927292	0.539808	0.641177	0.538572	0.505358	0.86495	0.527034
0.655544	0.63282	0.537433	0.995744	0.567724	0.664236	0.547552	0.671719	0.878037	0.563087
0.881001	0.786472	0.560631	1.00846	0.608768	0.712161	0.596796	0.708069	0.897944	0.637397
0.881081	0.834158	0.788392	1.05229	0.710647	0.723644	0.605522	0.714786	0.918128	0.649144
0.889001	0.843259	0.79882	1.08483	0.730837	0.796135	0.620746	0.740416	0.974325	0.683631
0.903393	0.847575	0.847128	1.20719	0.745663	0.810069	0.660834	0.740651	1.03831	0.700095
1.14282	0.878357	0.854518	1.28487	0.802713	0.8577	0.663793	0.782475	1.17021	0.703001
1.22362	0.881382	0.904593	2.31047	0.838961	0.894581	0.674934	0.859407	1.21367	0.704869
	0.93035	0.952633		0.855218	0.960314	0.756746	0.895789	1.29941	0.783939
	0.950837	0.955475		0.863582	0.974815	0.759341	0.917189	1.35319	0.788262
	1.09421	0.9651		0.866411	1.02345	0.831843	0.987475	1.44918	0.828037
	1.10198	1.10872		1.06549	1.03332	0.844114	0.992812	1.55885	0.828159
	1.13342	1.8023		1.10706	1.0887	0.853983	0.997683		0.845502
	1.28353	2.39316		1.12686	1.16783	0.874175	1.00371		0.848645
	1.4429			1.18637	1.26442	0.897699	1.03775		0.855753
	1.88135			1.21289	1.29006	0.924284	1.04508		0.866556
	2.20079			1.23058		0.972762	1.06797		0.885428
	2.37552			1.34644		0.976819	1.08661		0.919563
	2.93722			1.51915		1.0194	1.0954		1.09541
				1.79224		1.03902	1.13052		1.10597
				1.93295		1.04825	1.13481		1.53079
						1.05496	1.13914
						1.11383	1.1984
						1.12125	1.20753
						1.13417	1.21629
						1.20609	1.23907
						1.22952	1.2707
						1.23013	1.40732
						1.24746	1.41478
						1.29974	1.47709
						1.31064	1.58572
						1.32536	1.62301
						1.34362	1.77585
						1.35484
						1.61355
						2.00131
