# Supplementary material for: Expanded genetic screening in Caenorhabditis elegans identifies new regulators and an inhibitory role for NAD+ in axon regeneration
Source: eLife journal article supplement (doi:10.7554/elife.39756), 2018-11-21
Supplement: supp [file elife-39756-supp-v1.zip › elife_poa_e39756_Figure_4_source_data_1.xlsx]

## Sheet: A
WT	atgl-1(9hr)		hosl-1	abhd-5.2(ok3245)	abhd-5.1(ok3722)	lid-1(gk)	abhd-5.1 abhd-5.2	abhd-5.1 abhd-5.2; lid-1
0.744939	0.663968		0.824375	0.272136	0.847206	0.642093	0.72774	0.659247
0.777328	0.793522		0.959076	0.416208	0.882877	0.766944	0.881849	0.67637
0.793522	0.923077		1.0399	0.597503	0.900713	0.78478	0.907534	0.761986
0.825911	1.03644		1.11174	0.64032	0.972057	0.865042	0.984589	0.787671
0.842105	1.05263		1.15664	0.672336	1.00773	0.927467	0.993151	0.924658
0.923077	1.32794		1.28236	0.792396	1.06124	0.927467	1.01027	0.933219
0.923077	0.906883		1.30032	0.8004	1.07015	0.998811	1.13014	1.0274
0.955466	0.906883		1.33624	0.84042	1.10583	1.07907	1.14726	1.12157
0.987854	1.23077		1.36318	0.87396	1.12366	1.10583	1.15582	1.19007
1.02024	1.19838		1.37216	0.918549	1.25743	1.12366	1.21575	1.29281
1.02024	1.05263		1.56972	0.968484	1.26635	1.2396	1.24144	1.37843
1.06883	1.11741			0.989893	1.41796	1.26635	1.36986	1.42979
1.06883	1.45749			1.0005	1.41796	1.31094	1.48973	1.57534
1.18219	1.10122			1.10455	1.53389	1.38228	1.56678
1.23077	1.55466			1.11256	1.59631	1.44471	1.62671
1.63563	1.26316			1.11474	1.60523	1.55172
	0.842105			1.12056	1.77467
	0.793522			1.12366
	1.23077			1.12366
	1.73279			1.1415
				1.18609
				1.18609
				1.19501
				1.25743
				1.30202
				1.40012
				1.43579
				1.49675
				1.51276

## Sheet: B
lipl-1	lipl-3	lipl-4	lgg-1	lgg-2	hlh-30	mxl-3	nhr-49	nhr-80
0.699939	0.468463	0.685962	0.0366404	0.411792	0.775357	0.0471513	0.776266	0.390738
0.837722	0.707287	0.772793	0.311005	0.510551	0.784373	0.408395	0.784949	0.694646
0.938763	0.817514	0.816208	0.485127	0.598263	0.784483	0.416503	0.863097	0.729378
0.993876	0.955297	0.833574	0.53429	0.738117	0.827586	0.612592	0.889146	0.920405
1.18677	0.982854	1.05933	0.59762	0.786249	0.87069	0.620825	0.967294	0.963821
1.26026	0.982854	1.09407	0.615558	0.816887	0.87931	0.638117	1.06281	0.998553
1.27863	1.0839	1.10275	0.618713	0.870201	0.956897	0.663641	1.26252	0.998553
1.32456	1.11145	1.18958	0.625744	0.89351	1.00862	0.699411	1.28857	1.04197
1.32456	1.21249	1.19826	0.740135	0.936013	1.01878	0.722986	1.29725	1.20695
1.37048	1.3319	1.22431	0.76636	0.959308	1.03681	0.738209	1.3233	1.36324
1.54501	1.44213	1.25036	0.850056	0.959837	1.0431	0.771018	1.34067	1.68451
1.65524	1.5248	1.37193	0.85129	0.986746	1.08189	0.774248	1.40145
	1.57991	1.37193	0.85129	0.999471	1.08621	0.782757	1.50564
	1.68095	1.40666	0.85327	1.00229	1.10894	0.793713	1.60984
	1.7177	1.47612	0.943096	1.01534	1.14655	0.799773
		1.51085	0.943096	1.02327	1.16304	0.799773
			0.998378	1.04706	1.1991	0.799773
			1.00395	1.10173	1.21713	0.817289
			1.06257	1.11052	1.25319	0.825147
			1.07572	1.14991	1.28448	0.825147
			1.07723	1.15385	1.2931	0.836637
			1.08498	1.15768	1.39655	0.876347
			1.08498	1.15768	1.42241	0.877649
			1.09188	1.16545	1.46056	0.877649
			1.10167	1.18311	1.46957	0.885851
			1.10167	1.2049	1.47414	0.885851
			1.10654	1.21207	1.52367	0.885851
			1.10654	1.21363	1.53268	0.894053
			1.14035	1.21364	1.57759	0.902256
			1.1434	1.22951	1.58678	0.918888
			1.1434	1.3247	1.60481	0.943267
			1.14603	1.32743		0.958743
			1.16009	1.33764		0.959672
			1.16009	1.34415		0.961429
			1.18118	1.34588		1.0295
			1.18715	1.36623		1.0295
			1.18821	1.40402		1.06876
			1.23605	1.41195		1.0745
			1.2519	1.41988		1.09756
			1.2519	1.42726		1.13159
			1.25199	1.45955		1.1401
			1.2531	1.47039		1.14833
			1.27592	1.47039		1.23035
			1.27592	1.4883		1.34518
			1.31579	1.49081		1.40668
			1.31579	1.51508		1.61656
			1.41882	1.53165
			1.41882	1.54187
			1.46055	1.55951
			1.46055	1.60233
			1.5607	1.61038
			1.5607	1.63406
			1.57739	1.66271
			1.57739	1.74609
			1.5949	1.76371
			1.63115	1.82401
			1.71477	1.83798
			1.73046	2.28727
			1.8695
			1.8695

## Sheet: D
cka-1(tm1241)	cka-2 (tm841)	cka-1; cka-2	pcyt-1(et9)	pcyt-2.1(gk440213)	pcyt-2.2(ok2179)	pcyt-1; pcyt-2.1	pcyt-2.1; pcyt-2.2	cept-1(et10)	cept-2(ok3135)
0.27864	0.284256	0.299054	0.391403	0.555431	0.491235	0.683952	0.60759	0.316109	0.0860215
0.508146	0.35532	0.409967	0.604042	0.676677	0.683677	0.72763	0.745204	0.330134	0.141298
0.559905	0.387622	0.476515	0.634993	0.709744	0.783865	0.764028	0.827773	0.442553	0.196248
0.576468	0.497448	0.624399	0.910493	0.842013	0.849335	0.785867	0.891993	0.458359	0.207885
0.596876	0.503908	0.653316	0.910993	0.908147	0.989202	0.807706	0.937865	0.533627	0.250896
0.607195	0.522402	0.68956	0.944419	0.919169	1.05269	0.858663	1.02961	0.592979	0.290447
0.777939	0.52329	0.727918	0.965429	0.919169	1.15982	0.92418	1.09383	0.648024	0.400345
0.803913	0.587893	0.7501	0.971159	0.952236	1.38797	1.02609	1.13053	0.652332	0.447445
0.803913	0.618641	0.75402	1.02273	1.02939	1.46336	1.14257	1.13053	0.695441	0.557344
0.803913	0.646037	0.779677	1.02932	1.02939	1.49411	1.19352	1.24062	0.734954	0.55914
0.818702	0.71064	0.789474	1.08194	1.10655		1.21536	1.24062	0.81343	0.604443
0.818702	0.801085	0.804155	1.11375	1.10655		1.25176	1.4975	0.861398	0.612293
0.840884	0.887448	0.834859	1.13542	1.22779		1.26632		0.893009	0.666667
0.848016	0.904451	0.842424	1.16503	1.29393				0.956231	0.675092
0.874295	0.94262	0.847128	1.17076					0.957572	0.74552
0.891814	0.969361	0.861013	1.23779					0.966051	0.792841
0.922221	0.981976	0.861013	1.25194					1.08268	0.795699
0.953132	1.05429	0.865117	1.2972					1.13009	0.808541
0.966586	1.11548	0.868407	1.38755					1.16954	0.84779
1.04792	1.14994	0.912772	1.48796					1.20122	0.953405
1.17212	1.20886	0.933075						1.27129	0.982079
1.18964	1.22747	0.947399						1.37508	1.00358
1.21059	1.23927	0.947399						1.50022	1.06759
1.58125	1.25859	1.0015							1.11828
	1.26601	1.0047							1.18534
		1.03335							1.24731
		1.06805							1.26882
		1.08348
		1.09961
		1.11929
		1.1551
		1.2124
		1.22064
		1.44
		1.592
