# Supplementary material for: Expanded genetic screening in Caenorhabditis elegans identifies new regulators and an inhibitory role for NAD+ in axon regeneration
Source: eLife journal article supplement (doi:10.7554/elife.39756), 2018-11-21
Supplement: supp [file elife-39756-supp-v1.zip › elife_poa_e39756_Figure_5_source_data_1.xlsx]

## Sheet: B
WT	ivns-1(ok3171)	ivns-1(ok3171); juEx[ivns-1]	ivns-1(gk252)	ivns-1(gk252); juEx[ivns-1]	juEx[ivns-1]	kel-8(tm5214)		WT	kel-20(tm3676)
1.21544	1.44037	1.27785	1.39932	0.394648	0.293839	0.355083		1.23955	0.874564
1.22513	1.36697	0.486816	1.52348	0.451004	0.333956	0.491654		1.17857	0.726481
0.0768882	1.56881	0.394947	1.37291	0.649695	0.414976	0.61912		0.673345	1.12718
1.34136	1.11009	0.505189	1.91709	0.726342	0.416549	0.701062		1.06533	0.8223
0.821835	1.3945	1.10572	1.07352	0.767498	0.658035	0.710167		0.908537	0.665505
1.86001	2.13761	1.03803	1.28749	0.783323	0.746921	0.7739		0.917247	1.32753
0.759316	1.61468	0.45587	1.36146	0.786299	0.749281	0.837633		0.882404	0.839721
0.194002	0.944954	1.43838	0.429835	0.792101	0.988408	0.901366		1.21341	0.987805
0.992662	1.17431	1.44322	1.34862	0.823046	1.15831	0.91047		1.26568	0.848432
0.78221	1.22018	0.921285	0.989124	0.846622	1.2472	0.955994		0.847561	1.223
1.2172	0.958963	0.979966	1.62657	0.886184	1.37777	1.13809		0.716899	0.970383
0.515403	1.78756	0.811037	0.919221	0.894096	1.50206	1.14719		1.19599	0.726481
1.00499	1.70743	2.50033	0.840997	0.909921		1.20182		0.925958	0.569686
1.17758	1.2971	1.02442	1.65154	0.914914		1.37481		0.969512	1.223
1.81598	1.41509	1.11333	1.64654	0.925552		1.63885
1.42799	1.22577	1.39162	1.25625	0.949483
1.68254	1.93549	1.30387	1.13725	0.968102
1.43058	1.22753	1.29323	1.5833	0.996957
0.412374	1.88002	0.206674	1.2729	1.00485
1.02502	1.10099	0.988539	1.10563	1.05234
0.565968	0.844931	1.01741	0.658228	1.09513
1.33221	1.25828	1.29323	1.06272	1.14759
0.746311	0.918635	1.07972	1.34316	1.15087
0.817931	0.743874	0.675489	1.42136	1.16925
0.872293	1.17622	0.885962	1.48878	1.17021
1.27008	0.666371	1.14658	0.644745	1.19477
1.40556	1.41101	0.623821	1.56428	1.22823
0.490897	1.082	0.8077	1.49148	1.24224
1.2975	0.887277	0.854809	1.38002	1.25806
1.3161	1.63019	0.966504	1.31709	1.31345
1.58838	1.34499		1.06026	1.32977
0.785906	1.26417		1.3451	1.34138
1.3643	1.39472		1.66159	1.3451
0.763074	1.72965		1.12355	1.37675
0.530871	0.67202		1.07608	1.37787
0.475569			1.80402	1.66951
1.21717			1.12355	1.72373
0.847635			1.51126
0.478105			0.799148
1.36007			1.25806
0.975321			1.40049
0.971196			1.06817
1.13366			0.846622
0.77392			1.32136
1.56689			1.72489
0.859987			1.27389
0.820338			0.925745
1.04856			1.29763
1.02535			2.13634
1.1588			1.00487
2.02623			1.02861
0.804866
0.370666
0.466402
0.97313

## Sheet: C
WT	ivns-1(ok3171)	ivns-1(gk252)
0	0.148148	0
0	0.296296	0.592593
0.148148	0.592593	0.592593
0.148148	0.740741	0.740741
0.296296	1.48148	0.888889
0.444444	2.07407	1.48148
0.592593	2.51852	1.77778
0.592593	2.96296	2.22222
0.740741	3.11111	2.51852
0.740741	3.25926	2.66667
1.48148	3.55556	3.25926
1.92593	3.55556	4
1.92593	4	4
1.92593	4	4.14815
2.07407	4.14815	4.74074
2.96296	4.44444	4.88889
	4.74074	5.03704
	4.88889
