# Supplementary figures and images for: Expanded genetic screening in Caenorhabditis elegans identifies new regulators and an inhibitory role for NAD+ in axon regeneration
Source: eLife journal article supplement (doi:10.7554/elife.39756), 2018-11-21

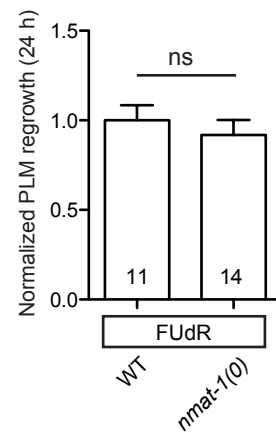

Supplement: supp [file elife-39756-supp-v1.zip › elife_poa_e39756_Figure_2_figure_supplement_1.pdf]

*Pesyt-2::GFP*

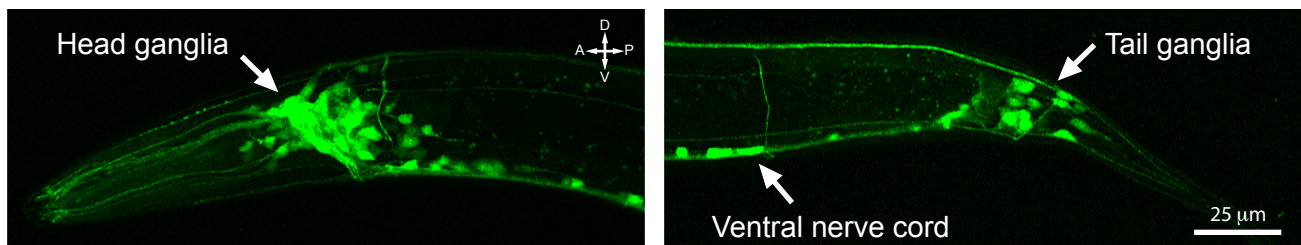

Supplement: supp [file elife-39756-supp-v1.zip › elife_poa_e39756_Figure_3_figure_supplement_1.pdf]

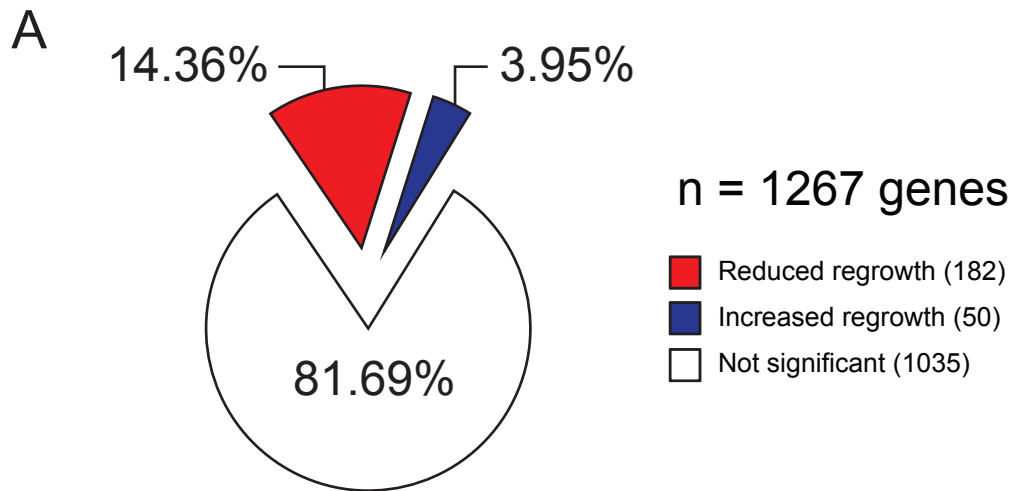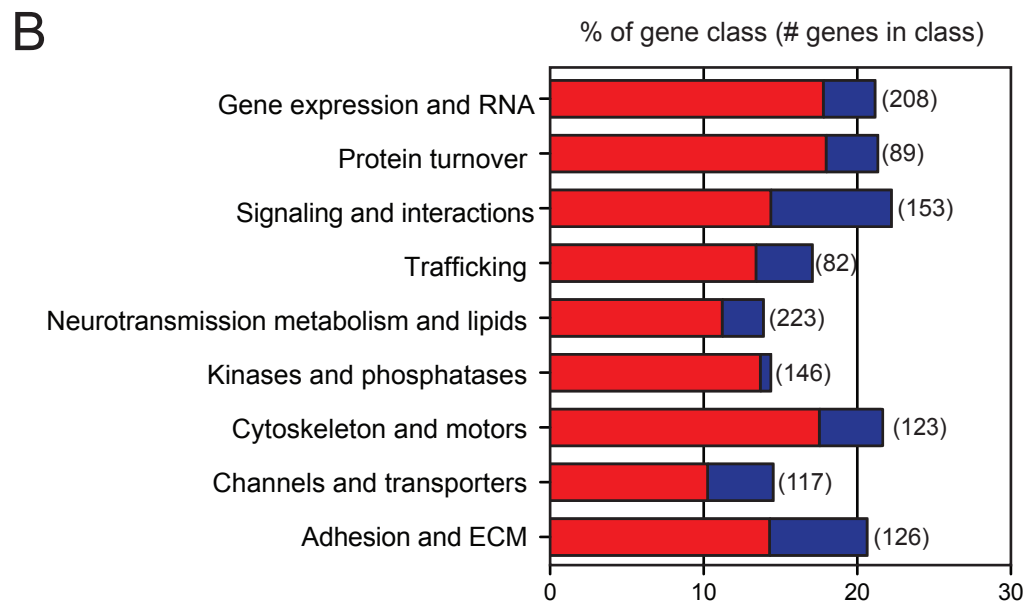

Supplement: supp [file elife-39756-supp-v1.zip › elife_poa_e39756_Figure_1_figure_supplement_1.pdf]

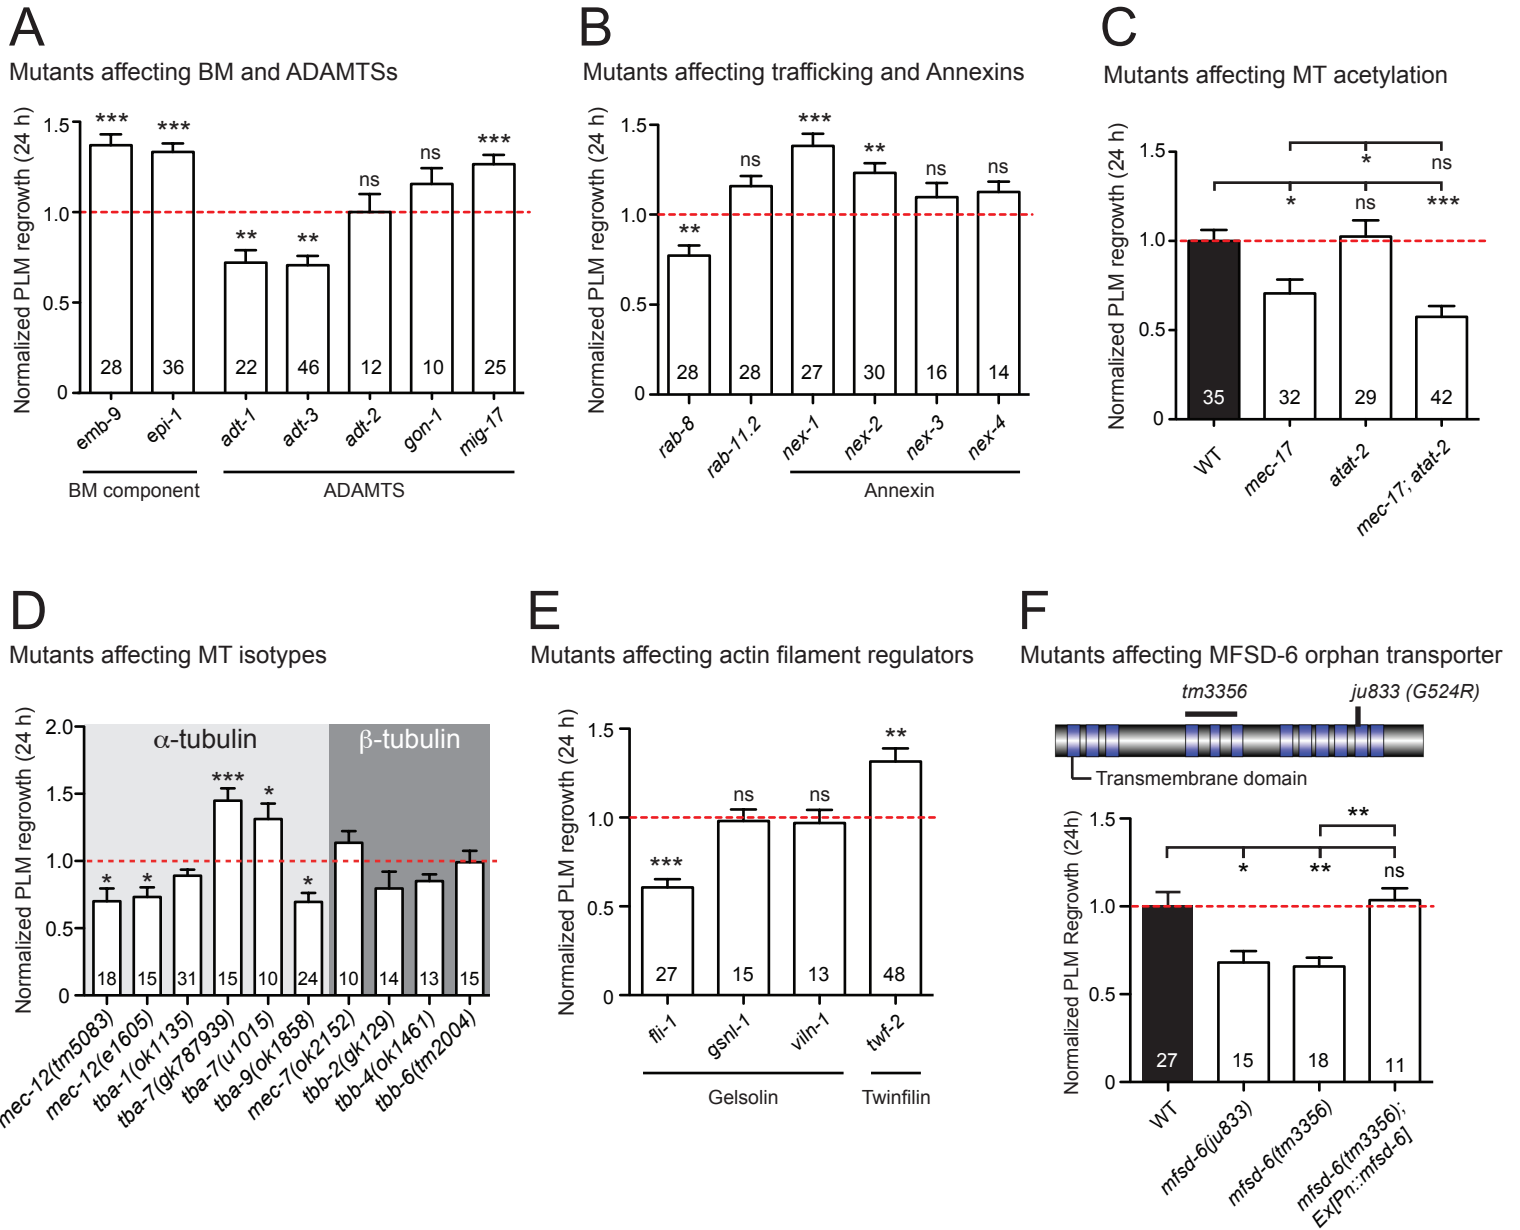

Supplement: supp [file elife-39756-supp-v1.zip › elife_poa_e39756_Figure_1_figure_supplement_2.pdf]
